# Gender, Season and Management Affect Fecal Glucocorticoid Metabolite Concentrations in Captive Goral (*Naemorhedus griseus*) in Thailand

Jaruwan Khonmee<sup>1\*</sup>, Janine L. Brown<sup>2</sup>, Suvichai Rojanasthien<sup>1</sup>, Anurut Aunsusin<sup>3</sup>, Dissakul Thumasanukul<sup>4</sup>, Adisorn Kongphoemphun<sup>4</sup>, Boripat Siriaroonrat<sup>5</sup>, Wanlaya Tipkantha<sup>5</sup>, Veerasak Punyapornwithaya<sup>1</sup>, Chatchote Thitaram<sup>1\*</sup>

**1** Faculty of Veterinary Medicine, Chiang Mai University, Chiang Mai, Thailand, **2** Center for Species Survival, Smithsonian Conservation Biology Institute, Front Royal, Virginia, United States of America, **3** Chiang Mai Night Safari, Chiang Mai, Thailand, **4** Omkoi Wildlife Sanctuary, Department of National Park, Wildlife and Plant Conservation, Chiang Mai, Thailand, **5** Conservation Research and Education Division, Zoological Park Organization, Bangkok, Thailand

## Abstract

Chinese goral (*Naemorhedus griseus*) are a threatened species in Thailand and the focus of captive breeding for possible reintroduction. However, little is known of their biology or what factors in the captive environment affect welfare. Our objective was to determine the impact of gender, season, and management on goral adrenal activity. We hypothesized that differences in fecal glucocorticoid concentrations would be related to animal density. Fecal samples were collected 3 days/week for 1 year from 63 individuals (n = 32 males, 31 females) at two facilities that house the majority of goral in Thailand: Omkoi Wildlife Sanctuary (Omkoi), an off-exhibit breeding center that houses goral in individual pens (16 pens; n = 8 males, 8 females) and in small family groups (8 pens; n = 8 males, 8 females); and the Chiang Mai Night Safari (NS), a zoo that maintains 31 goral (n = 17 males, 14 females) in one large pen. Glucocorticoid metabolite concentrations were higher in male than female goral at Omkoi throughout the year, and there was a seasonal effect on adrenal activity ( $p < 0.05$ ). Goral at Omkoi and NS were used to test the effect of animal density on fecal glucocorticoid excretion of goral housed in similar-sized enclosures. Overall, the highest levels were found at NS (n = 31 adults/pen; 27 m<sup>2</sup> per animal) compared to Omkoi (n = 2 adults/pen; 400 m<sup>2</sup> per animal) ( $p < 0.05$ ). Overall findings support our hypothesis that animal density and aspects of the captive environment impact adrenal steroid activity in captive goral. In addition, gender and season also had significant effects on glucocorticoid metabolite production. Potential stressors pertaining to the welfare of this species were identified, which will guide future efforts to improve management and create self-sustaining and healthy populations of this threatened species.

**Citation:** Khonmee J, Brown JL, Rojanasthien S, Aunsusin A, Thumasanukul D, et al. (2014) Gender, Season and Management Affect Fecal Glucocorticoid Metabolite Concentrations in Captive Goral (*Naemorhedus griseus*) in Thailand. PLoS ONE 9(3): e91633. doi:10.1371/journal.pone.0091633

**Editor:** Cheryl S. Rosenfeld, University of Missouri, United States of America

**Received:** November 12, 2013; **Accepted:** February 11, 2014; **Published:** March 17, 2014

This is an open-access article, free of all copyright, and may be freely reproduced, distributed, transmitted, modified, built upon, or otherwise used by anyone for any lawful purpose. The work is made available under the Creative Commons CC0 public domain dedication.

**Funding:** This study was funded by National Research Council of Thailand (NRCT). All laboratory analyses and additional lab support was provided by Faculty of Veterinary Medicine, Chiang Mai University. The funders had no role in study design, data collection and analysis, decision to publish, or preparation of the manuscript.

**Competing Interests:** One or more of the authors are employed by a commercial company (Chiang Mai Night Safari). This does not alter the authors' adherence to PLOS ONE policies on sharing data and materials.

\* E-mail: jaruwan.khonmee@cmu.ac.th (JK); chatchote.thitaram@cmu.ac.th (CT)

## Introduction

Chinese, or grey long-tailed, goral (*Naemorhedus griseus*) are small ungulates with bovid-like features that inhabit mountainous areas of Myanmar, China, India, Thailand, and Vietnam [1–3]. They are agile and easily traverse steep cliffs and rocky crags [3]. Goral are diurnal and live in small family groups of 4–12 individuals; males are territorial and defend home ranges of 25–40 hectares in size [3]. Goral were listed in 1992 as one of 15 protected species under the Wild Animal Reservation and Protection of Thailand [4], and are categorized as Vulnerable by the IUCN Red List [3]. Most goral in Thailand are found within seven protected areas in the northern part of the country, restricted to hills along the Ping River, in the Chiang Mai, Mae Hong Son and Tak Provinces [3,4]. There has been no estimate of the total population size of wild goral, but numbers are declining throughout their range because of habitat loss, over-hunting and disease [3,4]. As a result,

there is increasing interest by the Zoological Parks Organization of Thailand to initiate captive breeding programs for goral reintroduction. Today, captive populations are viewed as important “insurance” against environmental or anthropomorphic catastrophe [5,6], so efforts to improve breeding management for species like the goral are warranted.

There are about 100 goral housed among three captive facilities in Thailand, Omkoi Wildlife Sanctuary (Omkoi), Chiang Mai Night Safari (NS) and Chiang Mai Zoo. Omkoi and NS hold all but three of Thailand's captive goral and although there is breeding at both facilities, the populations are not self-sustaining. Goral management at the two facilities differs significantly. Omkoi is not open to the public and houses over 60 goral in small breeding groups (male, female and offspring) in both large- and small-sized enclosures, whereas NS is a tourist attraction and has 31 goral (n = 17 males, 14 females) kept together in one large

enclosure. Given that wild goral live in small family groups (herds of four to 12 individuals, usually with one breeding male) within established territories [3], this study examined how these differences in captive housing conditions in Thailand impact individual animal welfare through assessment of adrenal function. There are no published hormonal data, reproductive or adrenal, for goral of either sex. So, there is a need to more fully characterize the biology of this species and identify factors that affect reproduction and welfare to aid propagation and conservation efforts and guide management strategies.

A number of potential stressors exist in captive environments and animal responses can be species-specific. Studies have shown that stress from inadequate housing conditions, inappropriate social interactions or other husbandry factors can lead to heightened glucocorticoid production [7–18]. If a stressor persists or causes consecutive stress responses, chronic glucocorticoid exposure can lead to a number of problems, including abnormal animal behavior, decreased libido, suppressed immune function, poor population performance, and disruption of reproductive hormone secretion [19–23]. One way to monitor welfare is through the analysis of hormonal metabolites excreted in urine and feces [24,25]. Non-invasive glucocorticoid metabolite monitoring is now well established as a valuable tool for understanding adrenal function, and offers significant advantages over blood sampling for assessing stress status [13,22]. In particular, fecal glucocorticoid metabolite analysis techniques have been developed for a number of domestic and wildlife species, which have led to improved *ex situ* management [12,23,26,27]. The ease of fecal collection without animal disturbance and that data reflect pooled values over time makes this a particularly attractive approach for zoo-held species [22,23].

The objective of this study was to use fecal glucocorticoid analyses to determine the influence of gender, season and management on metabolite concentrations in male and female goral. Based on the natural history of goral, we tested the hypotheses that lower fecal glucocorticoid concentrations would be found in goral residing in lower density groups.

## Materials and Methods

### Ethics Statement

This study was conducted non-invasively, without animal handling. Fecal samples were collected from captive goral. Permission to conduct research at Omkoi Wildlife Sanctuary, a protected forest area in Thailand was granted by Department of National Parks, Wildlife and Plant Conservation (DNP) (Permit Number TS 0907.1/2501). Chiang Mai Night safari permissions were obtained from the staff veterinarian and mammal curator, who also were collaborators on the study. No permits were needed for the fecal sample collection. This study was approved by the Faculty of Veterinary Medicine Chiang Mai University Animal Care and Use Committee (FVM-ACUC) (Permit Number S22/2553).

### Seasonal Determination

There are three major seasons in Thailand: summer (February 16 – May 15), rainy (May 16 – October 15) and winter (October 16 – February 15). Information on daily temperature (°C) and rainfall (mm) during the study period at each facility was obtained from The Northern Meteorological Center, Meteorological Department, Ministry of Information and Communication Technology, Chiang Mai, Thailand [31].

## Animals and Sample Collection

A total of 63 captive-born goral were used in this study; 32 were housed at Omkoi (17° 48' 4" N, 98° 21' 31" E) (n = 16 males, 16 females) and 31 at NS (18° 41' 13" N, 98° 55' 8" E) (n = 17 males, 14 females). Singleton animals were housed in 16 pens (6 m × 9 m; Fig. 1A) (n = 8 males, 8 females) at Omkoi (17° 48' 4" N, 98° 21' 31" E). Another 16 goral were housed at Omkoi in larger pens (30 m × 40 m; Fig. 1B), which contained one adult male, one adult female and offspring up to ~5 months of age (8 pens; n = 8 males, 8 females; density = 400 m<sup>2</sup> per animal). At NS, 31 goral (n = 17 males, 14 females) were housed in one large enclosure (35 m × 24 m; Fig. 1C) (n = 31; density = 27 m<sup>2</sup> per animal).

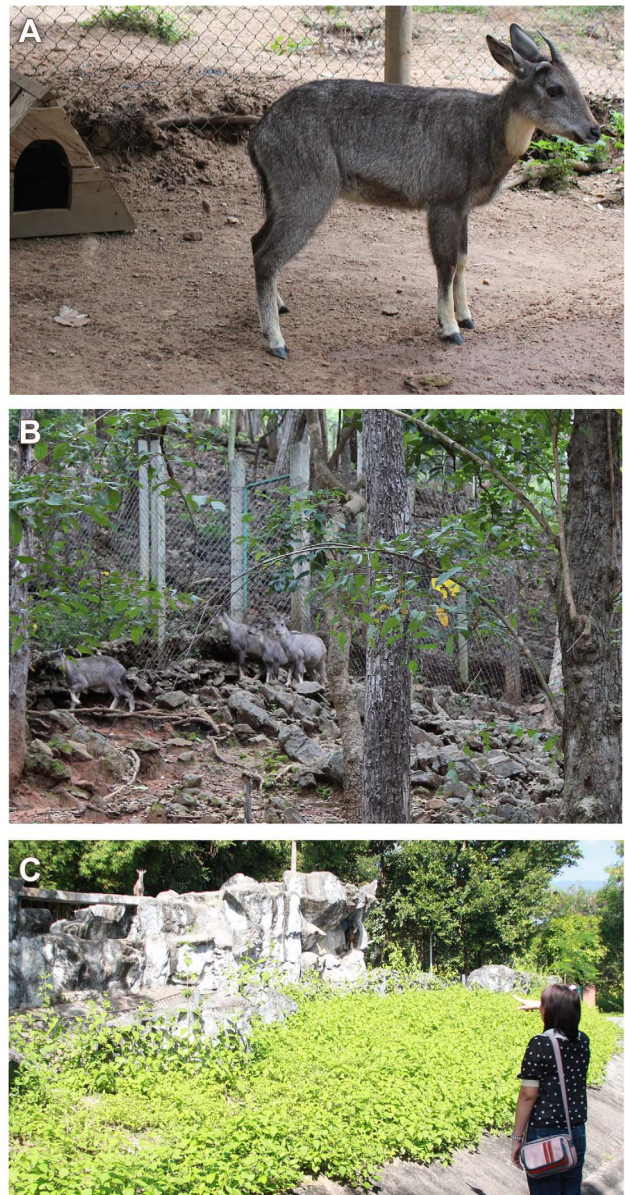

**Figure 1. Goral pens.** Examples of goral housing conditions: (a) as individuals in small pens (6 m × 9 m) at Omkoi Wildlife Sanctuary; (b) in family groups in large pens (30 m × 40 m) at Omkoi Wildlife Sanctuary; and (c) all animals together in a large (35 m × 24 m) at Night Safari. doi:10.1371/journal.pone.0091633.g001

Fecal samples from dependent offspring were not included in this study.

At Omkoi, the average age was  $5.20 \pm 0.57$  years for males, and  $6.11 \pm 0.92$  years for females. At NS, average ages were  $3.43 \pm 0.59$  and  $4.06 \pm 1.24$  years for males and females, respectively. All animals received natural light, and were fed concentrates (Betagro Company Limited, Thailand; Betagro 009 cattle finisher pellet (12% protein, 2% fat, 13% fiber, 13% moisture) and roughage (Panicum grass; *Brachiaria mutica*) once daily, with unlimited access to fresh water. A mineral block was provided in each enclosure at both facilities. All enclosures at Omkoi had dirt floors, an open shelter, a rock structure for climbing, and several natural trees for shade. The enclosure at NS contained an artificial rock and cliff structure in the middle, with about 13 m of dirt area behind it. Goral stayed primarily on the rock structure, which was ~5 m from the public area, separated by a water mote. NS was open to the public from 1100 to 2200 hours daily.

For health care and status, there was a staff veterinarian at each facility. All animals received annual physical examinations and blood chemistry analyses. They were dewormed every 3 months at Omkoi and every 6 months at NS. Keepers were responsible for noting any changes in health status; all animals were considered in good health during the study period. Identification of feces from individuals was accomplished through keeper observations. At both facilities, old feces were removed every evening, and freshly defecated feces (~30 g) were collected between 0830 and 0930 hours every morning from each goral 3 days/week for 1 year. All samples were stored at  $-20^{\circ}\text{C}$  until processing.

### Fecal Extraction

All chemicals were obtained from the Sigma Chemical Company (St. Louis, MO) unless otherwise stated. Wet fecal samples were dried using a conventional oven at  $60^{\circ}\text{C}$  for ~24–48 hours and stored at  $-20^{\circ}\text{C}$  until extraction. Frozen dried fecal samples were thawed at room temperature, mixed well and 0.1 g ( $\pm 0.01$ ) of dry powdered feces placed in a glass tube containing 90% ethanol in distilled water. Samples were extracted twice by shaking with a Multi Pulse vortexer (Glas-Col, Terre Haute, IN) set at 70 for 30 min, centrifuging at  $2500 \times g$  for 20 min and drying the combined supernatants under air in a  $50^{\circ}\text{C}$  water bath. Dried extracts were reconstituted by vortexing for 1 min in 1 ml dilution buffer (0.1 M  $\text{NaPO}_4$ , 0.149 M  $\text{NaCl}$ , pH 7.0). The extracts were stored at  $-20^{\circ}\text{C}$  until further analysis [28]. Extraction efficiency of glucocorticoid metabolites from feces was 89.2% based on the recovery of cortisol added to dried fecal samples before extraction.

### High Performance Liquid Chromatography

The numbers and relative proportions of immunoreactive glucocorticoid metabolites in goral fecal extracts were determined using reverse-phase high performance liquid chromatography (HPLC) [29]. Five fecal extracts from five gorals representing different months were combined, air dried, re-suspended in 1 ml methanol, dried again and stored at  $-20^{\circ}\text{C}$  until further processing. Extract pools were reconstituted with 0.5 ml in phosphate buffer (0.01 M  $\text{NaPO}_4$ , 0.14 M  $\text{NaCl}$ , 0.5% bovine serum albumin, pH 5.0) and filtered through a C-18 matrix cartridge (Spice<sup>TM</sup> Cartridge, VWR, West Chester, PA). The cartridge was washed with 5 ml distilled water and the total steroids eluted with 5 ml 100% methanol, evaporated to dryness, then reconstituted in 300  $\mu\text{l}$  of 100% methanol containing  $^3\text{H}$ -cortisol and  $^3\text{H}$ -corticosterone (~3,500 dpm each). Filtered fecal extracts (55  $\mu\text{l}$ ) were separated on a Microsorb C-18 column (Reverse Phase Microsorb<sup>TM</sup> MV 100 C18, 5  $\mu\text{m}$  diameter particle size; Varian Inc., Woburn, MA) using a linear gradient of

20–100% methanol in water over 80 min (1 ml/min flow rate, 1 ml fractions). A subsample of each fraction (100  $\mu\text{l}$ ) was counted for radioactivity in a dual-label channel beta scintillation counter (Beckman, Fullerton, CA) to determine the retention times for the radiolabeled reference tracers. The remainder of each fraction (900  $\mu\text{l}$ ) was evaporated to dryness, reconstituted in 200  $\mu\text{l}$  assay buffer (0.1 M  $\text{NaPO}_4$ , 0.149 M  $\text{NaCl}$ , 0.1% bovine serum albumin, pH 7.0) and an aliquot (50  $\mu\text{l}$ ) analyzed in singlet in the enzyme immunoassay (EIA).

### Enzyme Immunoassay

A single-antibody cortisol EIA was used to quantify glucocorticoid metabolites, which relied on a polyclonal antibody produced in rabbits against cortisol-3-carboxymethylloximine linked to bovine serum albumin (R4866). Horseradish-peroxidase (HRP)-conjugated cortisol served as the label and cortisol was used as the standard. The cortisol R4866 antibody crossreacts with cortisol (100%), prednisolone (9.9%), prednisone (6.3%), cortisone (5.0%), corticosterone (0.7%), 21-deoxycortisone (0.5%), deoxycortisone (0.3%), 11-deoxycortisol (0.2%), progesterone (0.2%),  $17\alpha$ -dihydroxyprogesterone (0.2%),  $17\alpha$ -dihydropregnenolone (0.1%), pregnenolone (0.1%), androstenedione (0.1%), testosterone (0.1%), androsterone (0.1%), dehydroepiandrosterone (0.1%), dehydroisoandrosterone-3-sulfate (0.1%), aldosterone (0.1%), estradiol- $17\beta$  (0.1%), estrone (0.1%), estriol (0.1%), spironolactone (0.1%) and cholesterol (0.1%) [30]. The EIA was performed in 96-well plates (Nunc Maxisorp, Fisher Scientific, Pittsburgh, PA) coated 16–24 hours previously with cortisol antiserum (50  $\mu\text{l}$  in coating buffer, 0.05 M  $\text{NaHCO}_3$ , pH 9.6; 1:10,000 dilution). Cortisol standards (50  $\mu\text{l}$ , range 3.9–1000 pg/well), diluted in assay buffer and samples (50  $\mu\text{l}$ , 1:2 dilution) were combined with cortisol-HRP (50  $\mu\text{l}$ ; 1:15,000 dilution) and incubated at room temperature for 1 hour. Plates were washed five times (Biochrom Anthos Fluido 2 microplate washer, Cambridge, UK) before addition of 100  $\mu\text{l}$  substrate (0.4 mM ABTS) to each well. After incubation for 15–30 min, the absorbance was measured at 405 nm (TECAN Sunrise microplate reader, Salzburg, Austria) until the optical density approached 1.0. The cortisol antibody and HRP were obtained from Coralie Munro (University of California, Davis, CA, USA).

The assay was validated for goral feces by showing that serial dilutions of pooled extracts produced displacement curves parallel to those of the cortisol standard curve. Pearson's correlation coefficient analyses were used to determine the correlation in percent binding between serial dilutions of hormone standards and fecal extract dilutions in the parallelism validation tests ( $r = 0.9595$ ). Addition of unlabeled cortisol standard (Sigma Diagnostics Cat. #H4001) to pooled fecal extracts before extraction resulted in a significant ( $p < 0.05$ ) recovery of mass for female ( $y = 1.03x - 0.10$ ,  $R^2 = 0.99$ ) and male ( $y = 0.97x - 0.14$ ,  $R^2 = 0.99$ ) goral. Physiological validation of the cortisol EIA was demonstrated by showing a significant increase (100–150% increase;  $p < 0.05$ ) in concentrations within 24–48 hours after a stressful event (e.g., blood collection,  $n = 2$ ; semen collection,  $n = 4$ ). Assay sensitivity was 0.078 ng/ml at 90% binding. Inter-assay CVs were  $< 15\%$  based on binding of high (30%) and low (70%) control samples. Samples were re-analyzed if the duplicate CV was  $> 10\%$ ; thus, intra-assay CVs were  $< 10\%$ . Data are expressed as ng/g dry feces.

### Data Analysis

Sixteen goral at Omkoi housed in individual pens ( $n = 8$  males, 8 females) were used to study the effect of gender and season on glucocorticoid excretion. Sixteen goral in eight large pens at

Omkoï (n = 8 males, 8 females) and all adult goral at NS (n = 17 males, 14 females) in one large pen were used to study the effect of management at each facility on glucocorticoid production. Goral at NS also were used for the seasonal analysis. Data are reported as the mean  $\pm$  standard error of mean (SEM). Glucocorticoid metabolite concentrations were averaged by week, followed by calculations of seasonal means. Data were analyzed by fitting a linear model using Generalized Least Squares method with R version 3.0.0 [32] and *nlme* package 3.1-110 [33]. Differences across gender (male vs. female), season (summer vs. rainy vs. winter) and animal density (large at Omkoï vs. large at NS) were analyzed using GLS for repeated measures data followed by a Bonferroni test for multiple comparison analysis. The significance level ( $\alpha$ ) was set at 0.05.

## Results

Analysis of HPLC-purified fecal eluates from male goral revealed the presence of several glucocorticoid metabolites, one of which co-eluted with the cortisol tracer (fraction 39–42) and represented 17.5% of the immunoreactivity (Fig. 2). Two immunoreactive peaks at fractions 25 (4.7%) and 33–37 (18.8%) appeared to be more polar, and five peaks (58.9% total immunoreactivity) were less polar than the tritiated reference tracers.

There was no difference in age between males and females at the two facilities. Fecal glucocorticoid metabolite concentrations were consistently higher ( $p < 0.05$ ) in male than female goral at Omkoï (Table 1, Fig. 3). For both sexes, mean glucocorticoid metabolite concentrations differed across seasons and were higher in the rainy season and winter, and lower in the summer ( $p < 0.05$ ) (Table 1, Fig. 3). There was no difference in glucocorticoid metabolites between the rainy season and winter for either sex ( $p > 0.05$ ) (Table 1).

Data on seasonal average daily temperature and rainfall between Omkoï and NS are shown in Table 2. Average temperature at NS was higher than that at Omkoï in every season ( $p < 0.05$ ). Temperatures differed across season for both facilities with the same trend, and were highest during the rainy season and lowest in the winter ( $p < 0.05$ ), although the difference between summer and rainy seasons at NS was not significant. The amount of rainfall was similar across facilities for summer and winter ( $p > 0.05$ ), but was significantly higher at NS compared to Omkoï. At

each facility, rainfall was highest in the rainy season, intermediate in the summer and lowest in the winter ( $p < 0.05$ ).

A comparison of glucocorticoid metabolite concentrations between Omkoï and NS is shown in Table 3. Further seasonal analyses revealed a significant facility effect on glucocorticoid concentrations in the summer, being lowest at Omkoï and highest at NS (Table 3, Fig. 4). Within Omkoï, glucocorticoids were lower in the summer ( $p < 0.05$ ), with concentrations being similar between the rainy season and winter ( $p > 0.05$ ). By contrast, at NS, the highest concentration was observed in summer ( $p < 0.05$ ), again with rainy and winter seasons being similar.

Across facilities, animals exhibited significantly higher glucocorticoid metabolite concentrations at NS compared to Omkoï (Table 3, Fig. 4). Because of the within facility difference in summer glucocorticoid responses (being lower at Omkoï and higher at NS), the overall difference between facilities was more than double in that season. By comparison, concentrations at NS were only about a third higher in the rainy and winter seasons compared to Omkoï. Moreover, goral at NS had a lower area per animal; the stocking density at NS was about 14 times greater than that at Omkoï.

## Discussion

A cortisol EIA was validated for quantifying fecal glucocorticoids in goral, a threatened species of national importance in Thailand. Findings support the hypothesis that glucocorticoid concentrations are higher in goral housed in animals maintained as one large group at NS compared to smaller, breeding groups at Omkoï. There also was a seasonal effect on glucocorticoid production, although it differed by facility. Specifically, in the summer, concentrations were lowest at Omkoï and highest at NS, possibly due to environmental differences. Higher fecal glucocorticoid metabolite concentrations were observed in male than female goral, irrespective of facility and season. Thus, results suggest that glucocorticoid production in goral is influenced by physiological, environmental and captive conditions, several of which have welfare and management implications.

HPLC analysis found the majority of glucocorticoid immunoreactivity in goral fecal extracts was associated with several peaks, two of which were more polar and five that were less polar than the tritiated reference tracers, indicating the presence of multiple metabolites. A proportion (17.5%) of the immunoreactivity co-

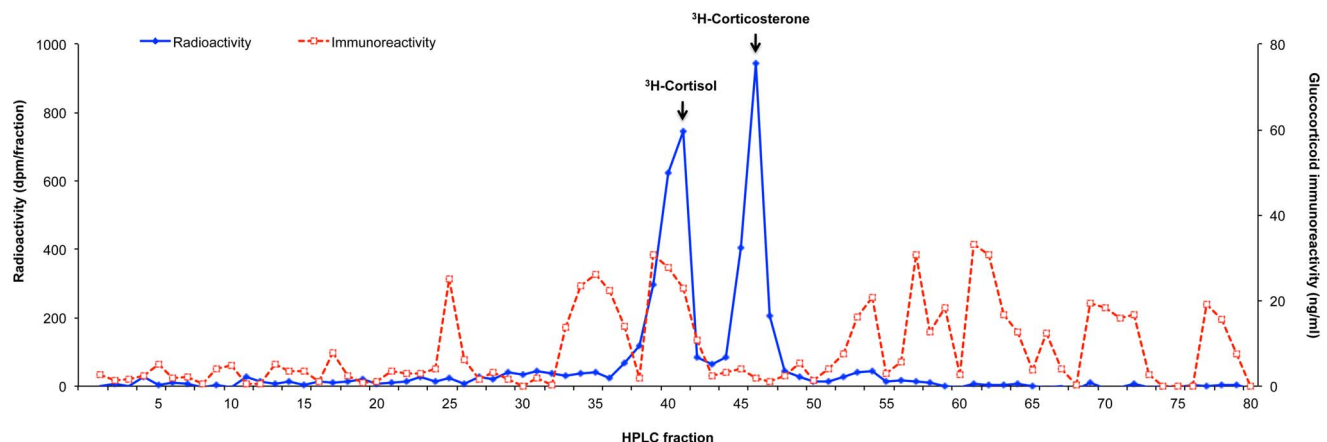

**Figure 2. Chromatographic analysis of glucocorticoid metabolite immunoreactivity.** Immunoreactivity of glucocorticoid metabolites in fecal extracts of goral was determined by reverse-phase HPLC analysis. Glucocorticoid concentration in each fraction was determined using a cortisol EIA. Elution of  $^3\text{H}$ -cortisol and  $^3\text{H}$ -corticosterone reference tracers in HPLC fractions of extracted fecal samples are indicated by the arrows. doi:10.1371/journal.pone.0091633.g002

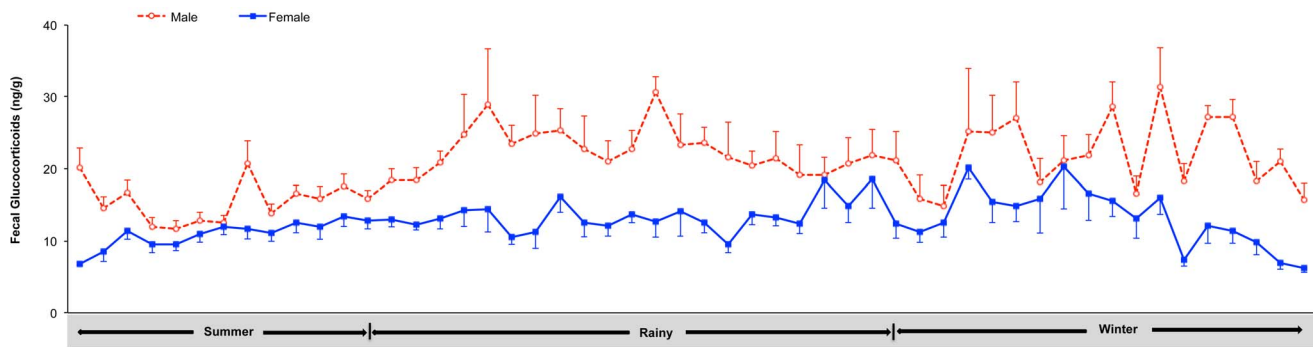

**Figure 3. Seasonal pattern of fecal glucocorticoids.** Longitudinal mean ( $\pm$  SEM) fecal glucocorticoid metabolite concentrations for male and female gorals were determined by a cortisol EIA. Fecal samples were collected from February 2010 through February 2011, representing the summer (February 16 – May 15), rainy (May 16 – October 15) and winter (October 16 – February 15) seasons. doi:10.1371/journal.pone.0091633.g003

eluted with radiolabeled cortisol. Several radiometabolism studies have demonstrated the near absence of authentic radiolabeled cortisol and corticosterone in feces; for example, in carnivores [34,35], lagomorphs [36], domestic livestock [37,38] and primates [39]. By contrast, immunoreactive substances in feces of the Himalayan black bear (*Ursus thibetanus*) and clouded leopard (*Neofelis nebulosa*) co-eluted with <sup>3</sup>H-cortisol, suggesting these species may excrete native cortisol in variable amounts [29], and so it appears that goral do as well.

Gender differences in adrenal activity have been reported previously and may be related to a variety of physiological and behavioral changes within each sex [23]. As with goral, other studies have shown that levels of glucocorticoids (serum or fecal) are higher in males than females, including the laboratory rat [40], marmoset (*Callithrix jacchus*) [41] and spider monkey (*Ateles geoffroyi yucatanensis*) [42]. By contrast, a number of studies have reported higher concentration in females, such as in the domestic dog and cat [35], clouded leopard (*Neofelis nebulosa*) [12], sheep [43,44] and chimpanzee (*Pan troglodytes*) [45]. Still others report no difference between genders; e.g., red deer (*Cervus elaphus*) [13], black (*Diceros bicornis*) and white (*Ceratotherium simum*) rhinoceros [46] and reindeer (*Rangifer tarandus*) [47]. It is not clear if such gender differences are strictly species dependent, or are influenced by other physiological factors. It has been suggested that when glucocorticoids are higher in females, differences may be related to evolutionary adaptations that increase alertness (i.e., increased anticipation of “fight or flight”) for protecting and rearing young [45,48] or to avoid aggression from dominant males [43], particularly in species where males are larger and more aggressive [12]. Gender effects may also be due to differences in steroid biosynthesis or metabolism [49]. For example, female rats excrete

less hormone into feces presumably because of higher plasma corticosterone-binding capacity [50–51]. There is no size difference between male and female goral, and little aggression is observed within family units. Similarly, infanticide is rare in this species. In the wild, gorals are polygynous and dominant males defend territories and access to females during the breeding season through threatening displays and combat with other males [3]. Thus, males might maintain higher levels of glucocorticoids on average to generate an advantage over competing males, a strategy that persists in captivity.

Glucocorticoid metabolite concentrations in goral varied across seasons, and overall means for both males and females were higher during the rainy season and winter than in the summer. Increased production of glucocorticoids enhances catabolic function during the winter as an adaptation to cold weather [13]. Other seasonal species show fluctuations in fecal glucocorticoid levels related to climate and/or the breeding season. A study of red deer showed a marked increase in fecal glucocorticoid metabolites in December and January, which followed the breeding season in September through November [13]. Deer mice (*Peromyscus maniculatus*) and red-backed voles (*Clethrionomys gapperi*) exhibit increases in fecal glucocorticoids in late August to late September and in mid- to late September, respectively, again following the late summer, early fall breeding seasons [52]. In free-ranging male muriqui monkeys (*Brachyteles arachnoides*), fecal glucocorticoid concentrations are increased during the mating period, which corresponds to the dry season in Brazil [53]. And in African elephants (*Loxodonta africana*), fecal glucocorticoids are higher in the dry season, presumably because of reductions in natural resources [54]. The seasonal increase in glucocorticoid production in goral preceded the purported winter breeding season by several months. Food and

**Table 1.** Mean ( $\pm$  SEM) fecal glucocorticoid metabolite concentrations (ng/g) between male and female goral at Omkoi Wildlife Sanctuary across the three seasons in Thailand.

| Season | Male                            | Female                          |
|--------|---------------------------------|---------------------------------|
| Summer | 15.30 $\pm$ 0.49 <sup>a,1</sup> | 11.22 $\pm$ 0.37 <sup>b,1</sup> |
| Rainy  | 22.10 $\pm$ 0.73 <sup>a,2</sup> | 13.37 $\pm$ 0.44 <sup>b,2</sup> |
| Winter | 21.98 $\pm$ 0.98 <sup>a,2</sup> | 13.27 $\pm$ 0.71 <sup>b,2</sup> |

<sup>a,b</sup>Values differ between male and female gorals, different letters indicate differences ( $p < 0.05$ ).  
<sup>1,2</sup>Values differ among seasons, different numbers indicate differences within the same gender ( $p < 0.05$ ).

doi:10.1371/journal.pone.0091633.t001

**Table 2.** Seasonal mean ( $\pm$  SEM) average daily temperature and rainfall at two captive goral facilities in Thailand.

| Environmental data                  | Season | Omkoï                           | Night Safari                    |
|-------------------------------------|--------|---------------------------------|---------------------------------|
| Average temperature ( $^{\circ}$ C) | Summer | 23.47 $\pm$ 2.30 <sup>a,1</sup> | 27.88 $\pm$ 2.73 <sup>b,1</sup> |
|                                     | Rainy  | 24.59 $\pm$ 1.85 <sup>a,2</sup> | 28.21 $\pm$ 2.13 <sup>b,1</sup> |
|                                     | Winter | 19.77 $\pm$ 1.69 <sup>a,3</sup> | 23.88 $\pm$ 2.05 <sup>b,2</sup> |
| Rainfall (mm)                       | Summer | 2.92 $\pm$ 0.29 <sup>a,1</sup>  | 2.34 $\pm$ 0.22 <sup>a,1</sup>  |
|                                     | Rainy  | 5.19 $\pm$ 0.39 <sup>a,2</sup>  | 6.39 $\pm$ 0.48 <sup>b,2</sup>  |
|                                     | Winter | 1.40 $\pm$ 0.12 <sup>a,3</sup>  | 1.14 $\pm$ 0.10 <sup>a,3</sup>  |

<sup>a,b</sup>Values differ among facilities, different letters indicate differences ( $p < 0.05$ ).

<sup>1,2</sup>Value differ among seasons, different numbers indicate differences within the same facility ( $p < 0.05$ ).

doi:10.1371/journal.pone.0091633.t002

water resources were consistent throughout the year for captive goral, eliminating that as a controlling factor. Nor was there a relationship between glucocorticoids and rainfall. However, further analyses revealed a significant facility effect with respect to seasonal glucocorticoid production, especially in the summer months, with concentrations at NS being about double those of Omkoï. Thus, we considered possible explanations for glucocorticoid differences due to both season and location. Animals at Omkoï had more shelter from the sun in the form of natural trees and a shed in each enclosure, whereas animals at NS had no such shade and the overall daily temperatures were higher. As a result, higher glucocorticoids during the summer months at NS could reflect a form of heat stress. High ambient temperatures, direct and indirect solar radiation, and humidity all are environmental stressors that affect animal welfare and can stimulate increased glucocorticoid production, as discussed for various livestock species [55]. A high Temperature-Humidity Index during the rainy season also has been suggested to be a source of stress in tropical species through alterations in the hypothalamo-pituitary-gonadal axis [56]. Secretion of cortisol stimulates physiological changes that allow animals to better cope with a hot environment [57], and for domestic cattle in South Africa, providing shade maintained lower serum cortisol concentrations and rectal temperatures [58]. Thus, the reduced fecal glucocorticoid concentrations across seasons at Omkoï, and especially in the summer, could be the result of a slightly cooler climate and perhaps more importantly, adequate shade being provided to the animals compared to NS. Moreover, Omkoï is located inside a wildlife sanctuary where wild goral live, so animals were exposed to more typical forest cover within their enclosures and a more natural climate.

Besides climate, animals are subjected to a number of other potential factors in the captive environment that can induce stress, such as health problems, limited space, artificial habitats, noise, exposure to the public and unnatural social groupings [15,59,60,61]. For most species, captive facilities are not likely to match the amount of space available to free-ranging individuals, but proper husbandry can enhance welfare and the likelihood for more natural behavior [10,12,14,18]. At both facilities, animals were found to be in good health by staff veterinarians, so that did not appear to be a significant factor in this study. However, the management of gorals at both facilities was different in that at NS animal density was 14 times higher than that at Omkoï. As recently reviewed by Creel et al. (2013), population density is one of the best-documented factors that influences the HPA axis. As far back as the 1950's it was recognized that increased population densities of wild and captive-held species, including mammals, birds, reptiles and amphibians, can result in antagonistic social interactions, suppression of reproduction, increased mortality and heightened adrenal activity (see review [62]). This may be particularly true for territorial species, where conspecific intrusion increases antagonistic encounters. For example, in a study of Peré David deer (*Elaphurus davidianus*), higher fecal glucocorticoids and increased aggression were observed in animals kept at a higher density [17]. Goral family units in the wild generally are under a dozen individuals, and usually include only one male for several females. Thus, a single enclosure containing 31 goral of equivalent gender numbers, such as that at NS, may be perceived as a stressor, and as a result, cause increased adrenal activity. During the breeding season, male goral can become aggressive. Based on keeper records, there was more fighting among the large number

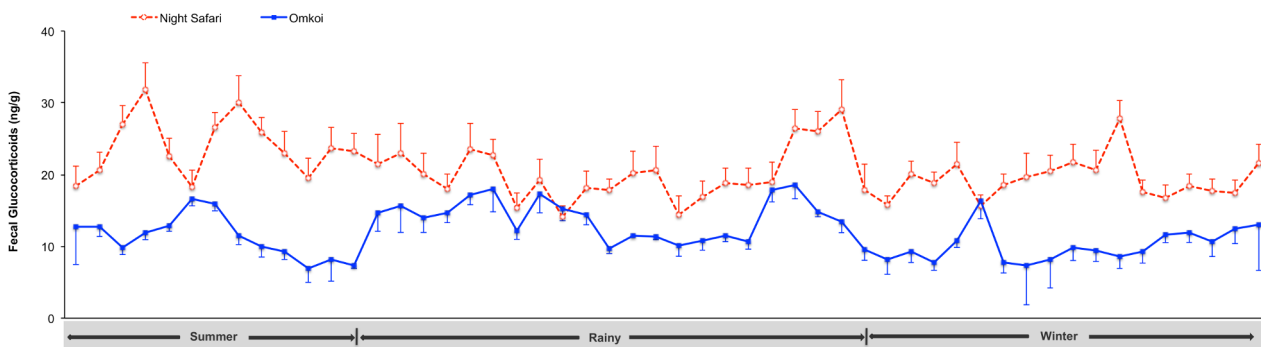

**Figure 4. Effect of housing on glucocorticoid production.** Longitudinal mean ( $\pm$  SEM) fecal glucocorticoid metabolite concentrations for goral housed at two facilities in Thailand, determined by a cortisol EIA. Fecal samples were collected from February 2010 through February 2011, representing the summer (February 16 – May 15), rainy (May 16 – October 15) and winter (October 16 – February 15) seasons. doi:10.1371/journal.pone.0091633.g004

**Table 3.** Facility effect on mean ( $\pm$  SEM) fecal glucocorticoid metabolite concentrations (ng/g) in goral housed in large (30 m $\times$ 40 m, area 400 m<sup>2</sup> per animal) enclosures at Omkoi Wildlife Sanctuary, and one large enclosure (35 m $\times$ 24 m, area 27 m<sup>2</sup> per animal) at Night Safari across the three seasons in Thailand.

| Season | Omkoi                           | Night Safari                    |
|--------|---------------------------------|---------------------------------|
| Summer | 9.94 $\pm$ 0.60 <sup>a,1</sup>  | 23.89 $\pm$ 0.83 <sup>b,1</sup> |
| Rainy  | 12.54 $\pm$ 0.43 <sup>a,2</sup> | 20.08 $\pm$ 0.64 <sup>b,2</sup> |
| Winter | 12.76 $\pm$ 0.67 <sup>a,2</sup> | 19.45 $\pm$ 0.54 <sup>b,2</sup> |

<sup>a,b</sup>Values differ among enclosure sizes, different letters indicate differences ( $p < 0.05$ ).

<sup>1,2</sup>Values differ among seasons, different numbers indicate differences within the same enclosure sizes ( $p < 0.05$ ).

doi:10.1371/journal.pone.0091633.t003

of conspecifics, especially males, at NS. By contrast, little aggression was observed among the animals housed in family units at Omkoi. Thus, limited space experienced by goral at NS could be one variable that explains the higher glucocorticoids found at this facility.

Besides more limited space, the animals at NS also were exposed to more noise and the physical presence of humans, which is a zoo and has a high rate of tourist activity. By comparison, Omkoi is a breeding center located in a wildlife sanctuary and not open to the public. The ability of zoo animals to tolerate large numbers of visitors may be species specific; some do well while others do not [63]. However, there are numerous examples of captive-held wildlife being negatively impacted by public exposure. For example, clouded leopards expressed higher fecal glucocorticoids when on display than off [12], and in spider monkey (*Ateles geoffroyi nufiventris*), the number of visitors had a stimulatory effect on the hypothalamic–pituitary–adrenal (HPA) axis [64]. Zoo visitor density also increased fecal glucocorticoid excretion and aggressive behavior in blackbuck (*Antelope cervicapra*) [65], whereas in black rhino, fecal glucocorticoids and mortality rates were correlated positively with the percentage of public visitor access around the enclosure [26], and in honeycreepers heightened glucocorticoid excretion was observed in animals exposed to environmental disturbances caused by humans and equipment [14]. Thus, forced proximity to humans can be harmful to animal well being in captive situations [15]. At NS, not only were goral exposed to tourists for 11 hours per day, but also the public area was only about 5 meters away from the animals. There was only a narrow water mote separating the two, with a rock structure abutting the mote. Goral spent most of the day on the rocks, and so were quite close to the visitors. As reviewed by Tarlow and Blumstein (2007), the distance by which an animal begins to flee from an approaching human is known as the ‘flight-initiation distance’ (FID), and can be used to define ‘set-back distances’ or ‘buffer zones’ when designing facilities. Goral at NS may perceive visitors as being too close, and this could be having an impact on chronic adrenal activity. An analysis of FID at NS could determine if the amount of set-back between goral and the public is adequate [66].

## References

- Rabinowitz A, Khaing ST (1998) Status of selected mammal species in North Myanmar. *Oryx* 32: 201–208.
- Patton ML, Aubrey L, Edwards M, Rieches R, Zuba J, et al. (2000) Successful contraception in a herd of Chinese goral (*Nemorhaedus goral amouxiensis*) with melengestrol acetate. *J Zoo Wildl Med* 31: 228–230.
- Duckworth JW, Steinmetz R, Chaiyarat R (2008) *Nemorhaedus griseus*. In: IUCN 2012. IUCN Red List of Threatened Species. Version 2012.2. Available: <http://www.iucnredlist.org>. Accessed 23 April 2013.
- Chaiyarat R, Laohajinda W, Kutintara U, Nabhitabhata J (1999) Ecology of the goral (*Nemorhaedus goral*) in Omkoi Wildlife Sanctuary Thailand. *Nat Hist Bull Siam Soc* 47: 191–205.
- Hoffmann M, Hilton-Taylor C, Angulo A, Böhm M, Brooks TM, et al. (2010) The Impact of conservation on the status of the world's vertebrates. *Science* 330: 1503–1509.
- Conde DA, Flesness N, Colchero F, Jones OR, Scheuerlein A (2011) An emerging role of zoos to conserve biodiversity. *Science* 331: 1390–1391.
- Mellen JD (1991) Factors influencing reproductive success in small captive exotic felids (*Felis* spp.): A multiple regression analysis. *Zoo Biol* 10: 95–110.

## Conclusion

It is undeniable that non-invasive fecal glucocorticoid metabolites monitoring is a valuable tool for advancing our understanding of adrenal function and stress responses in wildlife, and can enhance the *ex situ* management of threatened species. This study validated an EIA for assessing fecal glucocorticoids in goral, a species of high priority in Thailand, and found higher concentrations in males than females, and in animals housed at a higher animal density and exposed to human visitors. As designed, it was not possible to discriminate between the stress caused by a higher animal density or public exposure in this study; there were confounding factors at NS. Thus, additional studies are planned to determine with more certainty what factor(s), exposure to the public, area per animal or stocking density, impact individual animal welfare the most. Nevertheless, we have identified several potential stressors pertaining to the welfare of captive goral. Additionally, we will be relating fecal glucocorticoid metabolites measures with those of reproductive hormone metabolites in the same samples to help unravel how “stress” may be modulating reproductive function/performance and/or success. Together, this information will be crucial for guiding efforts to improve management and create self-sustaining and healthy populations of this nationally important species.

## Acknowledgments

The authors wish to thank the staff from Omkoi and Chiang Mai Night Safari for assisting with sample collection. We are also grateful to Nicole Presley (Smithsonian Conservation Biology Institute), Pallop Tankaw (Faculty of Veterinary Medicine, Chiang Mai University), Manisorn Tuantammar and Patharanun Wongchai (Zoological Parks Organization of Thailand) for technical support.

## Author Contributions

Conceived and designed the experiments: JK JLB CT VP SR BS. Performed the experiments: JK CT AA AK DT. Analyzed the data: JK JLB VP CT. Contributed reagents/materials/analysis tools: JK JLB CT BS WT. Wrote the paper: JK JLB CT. Collected and extracted the samples: JK AA AK DT.

8. Horton GMJ, Malinowski K, Burgher CC, Palatini DD (1991) The effect of space allowance and sex on blood catecholamines and cortisol, feed consumption and average daily gain in growing lambs. *Appl Anim Behav Sci* 32: 197–204.
9. Perkins LA (1992) Variables that influence the activity of captive orangutans. *Zoo Biol* 11: 177–186.
10. Carlstead K, Shepherdson D (1994) Effects of environmental enrichment on reproduction. *Zoo Biol* 13: 447–458.
11. Saito TR, Motomura N, Taniguchi K, Hokao R, Arkin A, et al. (1996) Effect of cage size on sexual behavior pattern in male rats. *Contemp Top Lab Anim Sci* 35: 80–82.
12. Wielebnowski NC, Fletchall N, Carlstead K, Busso JM, Brown JL (2002) Noninvasive assessment of adrenal activity associated with husbandry and behavioral factors in the North American clouded leopard population. *Zoo Biol* 21: 77–98.
13. Huber S, Palme R, Arnold W (2003) Effects of season, sex, and sample collection on concentrations of fecal cortisol metabolites in red deer (*Cervus elaphus*). *Gen Comp Endocrinol* 130: 48–54.
14. Shepherdson DJ, Carlstead KC, Wielebnowski N (2004) Cross-institutional assessment of stress responses in zoo animals using longitudinal monitoring of faecal corticoids and behaviour. *Anim Welf* 13: 105–113.
15. Morgan KN, Tromborg CT (2007) Sources of stress in captivity. *Appl Anim Behav Sci* 102: 262–302.
16. Moreira N, Brown JL, Moraes W, Swanson WF, Monteiro-Filho ELA (2007) Effect of housing and environmental enrichment on adrenocortical activity, behavior and reproductive cyclicity in the female tigrina (*Leopardus tigrinus*) and margay (*Leopardus wiedii*). *Zoo Biol* 26: 441–460.
17. Li C, Jiang Z, Tang S, Zeng Y (2007) Influence of enclosure size and animal density on fecal cortisol concentration and aggression in Pere David's deer stags. *Gen Comp Endocrinol* 151: 202–209.
18. Scarlata CD, Elias BA, Godwin JR, Powell RA, Shepherdson D, et al. (2013) The effect of housing conditions on adrenal activity of pygmy rabbits. *Anim Welf* 22: 357–368.
19. Liptrap RM (1993) Stress and reproduction in domestic animals. *Ann N Y Acad Sci* 697: 275–284.
20. Dobson H, Smith RF (1995) Stress and reproduction in farm animals. *J Reprod Fert* 49: 451–461.
21. Möstl E, Palme R (2002) Hormones as indicators of stress. *Domest Anim Endocrinol* 23: 67–74.
22. Millsbaugh JJ, Washburn BE (2004) Use of fecal glucocorticoid metabolite measures in conservation biology research: considerations for application and interpretation. *Gen Comp Endocrinol* 138: 189–199.
23. Touma C, Palme R (2005) Measuring fecal glucocorticoid metabolites in mammals and birds: the importance of validation. *Ann N Y Acad Sci* 1046: 54–74.
24. Palme R, Fischer P, Schildorfer H, Ismail MN (1996) Excretion of infused <sup>14</sup>C-steroid hormones via faeces and urine in domestic livestock. *Anim Reprod Sci* 43: 43–63.
25. Schwarzenberger F, Möstl E, Palme R, Bamberg E (1996) Faecal steroid analysis for non-invasive monitoring of reproductive status in farm, wild and zoo animals. *Anim Reprod Sci* 42: 515–526.
26. Carlstead K, Fraser J, Bennett C, Kleiman DG (1999) Black rhinoceros (*Diceros bicornis*) in U.S. zoos: II. behavior, breeding success, and mortality in relation to housing facilities. *Zoo Biol* 18: 35–52.
27. Morrow CJ, Kolver ES, Verkerk GA, Matthews LR (2002) Fecal glucocorticoid metabolites as a measure of adrenal activity in dairy cattle. *Gen Comp Endocrinol* 126: 229–241.
28. Brown JL, Wasser SK, Wildt DE, Graham LH (1994) Comparative aspects of steroid hormone metabolism and ovarian activity in felids, measured noninvasively in feces. *Biol Reprod* 51: 776–786.
29. Young KM, Walker SL, Lanthier C, Waddell WT, Monfort SL, et al. (2004) Noninvasive monitoring of adrenocortical activity in carnivores by fecal glucocorticoid analyses. *Gen Comp Endocrinol* 137: 148–165.
30. Young KM, Brown JL, Goodrowe KL (2001) Characterization of reproductive cycles and adrenal activity in the black-footed ferret (*Mustela nigripes*) by fecal hormone analysis. *Zoo Biol* 20: 517–536.
31. Thai Meteorological Department - Chiang Mai Weather (2013). Available: <http://www.tmd.go.th>. Accessed 2013 April 24.
32. R Development Core Team (2013) R: A language and environment for statistical computing Vienna: R Foundation for Statistical Computing. Available: <http://www.R-project.org/>. Accessed 2013 July 1
33. Pinheiro J, Bates D, DebRoy S, Sarkar D, the R Development Core Team (2013) nlme: Linear and nonlinear mixed effects models. R package version 3.1-110.
34. Graham LH, Brown JL (1996) Cortisol metabolism in the domestic cat and implications for non-invasive monitoring of adrenocortical function in endangered felids. *Zoo Biol* 15: 71–82.
35. Schatz S, Palme R (2001) Measurement of faecal cortisol metabolites in cats and dogs: a non-invasive method for evaluating adrenocortical function. *Vet Res Commun* 25: 271–287.
36. Teskey-Gerstl A, Bamberg E, Steineck T, Palme R (2000) Excretion of corticosteroids in urine and faeces of hares (*Lepus europaeus*). *J Comp Physiol B* 170: 163–168.
37. Palme R, Möstl E (1997) Measurement of cortisol metabolites in faeces of sheep as a parameter of cortisol concentration in blood. *Int. J. Mamm. Biol.* 62 (suppl. II): 192–197.
38. Möstl E, Messmann S, Bagu E, Robia C, Palme R (1999) Measurement of glucocorticoid metabolite concentrations in faeces of domestic livestock. *Zentralbl Veterinarmed A* 46: 621–631.
39. Bahr NI, Palme R, Möhle U, Hodges JK, Heistermann M (2000) Comparative aspects of the metabolism and excretion of cortisol in three individual nonhuman primates. *Gen Comp Endocrinol* 117: 427–438.
40. Cavigelli SA, Monfort SL, Whitney TK, Mechref YS, Novotny M, et al. (2005) Frequent serial fecal corticoid measures from rats reflect circadian and ovarian corticosterone rhythms. *J Endocrinol* 184: 153–163.
41. Ferreira Raminelli JL, Cordeiro de Sousa MB, Sousa Cunha M, Veloso Barbosa MF (2003) Morning and afternoon patterns of fecal cortisol excretion among reproductive and non-reproductive male and female common marmosets, *Callithrix jacchus*. *Biol Rhythm Res* 32: 159–167.
42. Rangel-Negrin A, Alfaro JL, Valdez RA, Romano MC, Serio-Silva JC (2009) Stress in Yucatan spider monkeys: effects of environmental conditions on fecal cortisol levels in wild and captive populations. *Anim Conserv* 12: 496–502.
43. Vandenheede M, Bouissou MF (1993) Sex differences in fear reactions in sheep. *Appl Anim Behav Sci* 37: 39–55.
44. van Lier E, Pérez-Clariget R, Forsberg M (2003) Sex differences in cortisol secretion after administration of an ACTH analogue in sheep during the breeding and non-breeding season. *Anim Reprod Sci* 79: 81–92.
45. Buirski P, Plutchik R, Kellerman H (1978) Sex differences, dominance, and personality in the chimpanzee. *Anim Behav* 26: 123–129.
46. Brown JL, Bellem AC, Fouraker M, Wildt DE, Roth TL (2001) Comparative analysis of gonadal and adrenal activity in the black and white rhinoceros in North America by noninvasive endocrine monitoring. *Zoo Biol* 20: 463–486.
47. Bubenik GA, Schams D, White RG, Rowell J, Blake J, et al. (1998) Seasonal levels of metabolic hormones and substrates in male and female reindeer (*Rangifer tarandus*). *Comp Biochem Physiol C Pharmacol Toxicol Endocrinol* 120: 307–315.
48. Gray JA (1987) The psychology of fear and stress. Cambridge: Cambridge University Press. 436 p.
49. Eriksson H, Gustafsson J-Å (1970) Steroids in germfree and conventional rats. *Eur J Biochem* 15: 132–139.
50. Ottenweller JE, Meier AH, Russo AC, Frenzke ME (1979) Circadian rhythms of plasma corticosterone binding activity in the rat and the mouse. *Acta Endocrinol* 91: 150–157.
51. Woodward CJ, Hervey GR, Oakey RE, Whitaker EM (1991) The effects of fasting on plasma corticosterone kinetics in rats. *Br J Nutr* 66: 117–127.
52. Harper JM, Austad SN (2001) Effect of capture and season on fecal glucocorticoid levels in deer mice (*Peromyscus maniculatus*) and red-backed voles (*Clethrionomys gapperi*). *Gen Comp Endocrinol* 123: 337–344.
53. Strier KB, Ziegler TE, Wittwer DJ (1999) Seasonal and social correlates of fecal testosterone and cortisol levels in wild male muriquis (*Brachyteles arachnoides*). *Horm Behav* 35: 125–134.
54. Foley C A H, Papageorge S, Wasser SK (2001) Noninvasive stress and reproductive measures of social and ecological pressures in free-ranging African elephants. *Conserv Biol* 15: 1134–1142.
55. Silanikove N (2000) Effects of heat stress on the welfare of extensively managed domestic ruminants. *Livest Prod Sci* 67: 1–18.
56. Thitaram C, Brown JL, Pongsopawijit P, Chansitthiwet S, Wongkalasin W, et al. (2008) Seasonal effects on the endocrine pattern of semi-captive female Asian elephants (*Elephas maximus*): Timing of the anovulatory luteinizing hormone surge determines the length of the estrous cycle. *Theriogenology* 69: 237–244.
57. Christison GI, Johnson HD (1972) Cortisol turnover in heat-stressed cows. *J Anim Sci* 35: 1005–1010.
58. Muller CJC, Botha JA, Smith WAC and WA (1994) Effect of shade on various parameters of Friesian cows in a Mediterranean climate in South Africa. 2. physiological responses. *S Afr J Anim Sci* 24: 56–60.
59. Cyr NE, Romero LM (2008) Fecal glucocorticoid metabolites of experimentally stressed captive and free-living starlings: implications for conservation research. *Gen Comp Endocrinol* 158: 20–28.
60. Poessel SA, Biggins DE, Santymire RM, Livieri TM, Crooks KR, et al. (2011) Environmental enrichment affects adrenocortical stress responses in the endangered black-footed ferret. *Gen Comp Endocrinol* 172: 526–533.
61. Tan HM, Ong SM, Langat G, Bahaman AR, Sharma RSK, et al. (2013) The influence of enclosure design on diurnal activity and stereotypic behaviour in captive Malayan Sun bears (*Helarctos malayanus*). *Res Vet Sci* 94: 228–239.
62. Creel S, Dantzer B, Goymann W, Rubenstein DR (2013) The ecology of stress: effects of the social environment. *Funct Ecol* 27: 66–80.
63. Hosey GR (2005) How does the zoo environment affect the behaviour of captive primates? *Appl Anim Behav Sci* 90: 107–129.
64. Davis N, Schaffner CM, Smith TE (2005) Evidence that zoo visitors influence HPA activity in spider monkeys (*Ateles geoffroyi rufiventris*). *Appl Anim Behav Sci* 90: 131–141.
65. Rajagopal T, Archunan G, Sekar M (2011) Impact of zoo visitors on the fecal cortisol levels and behavior of an endangered species: Indian blackbuck (*Antelope cervicapra L.*). *J Appl Anim Welf Sci* 14: 18–32.
66. Tarlow EM, Blumstein DT (2007) Evaluating methods to quantify anthropogenic stressors on wild animals. *Appl Anim Behav Sci* 102: 429–451.
